# Supplementary material
Source: PubMed Central journal article supplement (PMC8190820)
Supplement: NIHMS1529297-supplement-Supplement1.pdf [file NIHMS1529297-supplement-Supplement1.pdf]

1 **Supporting Information**

2 **Long term in situ reduction in soil lead bioavailability measured in a**  
3 **mouse model**

4 **Karen D. Bradham,<sup>\*,†</sup> Gary L. Diamond,<sup>‡</sup> Clay M. Nelson,<sup>†</sup> Matt Noerpel,<sup>§</sup> Kirk G.**  
5 **Scheckel,<sup>§</sup> Brittany Elek,<sup>||</sup> Rufus L. Chaney,<sup>#</sup> Qing Ma,<sup>&</sup> and David J. Thomas<sup>||</sup>**

6  
7 <sup>†</sup>Office of Research and Development, United States Environmental Protection Agency (U.S.  
8 EPA), Research Triangle Park, North Carolina, 27711, United States

9 <sup>‡</sup>SRC, Inc., North Syracuse, NY 13212

10 <sup>§</sup>Office of Research and Development, United States Environmental Protection Agency (U.S.  
11 EPA), Cincinnati, Ohio, 45224, United States

12 <sup>||</sup>Pharmacokinetics Branch, Integrated Systems Toxicology Division, National Health and  
13 Environmental Effects Laboratory, ORD, US EPA, RTP, NC, 27709

14 <sup>#</sup>USDA-ARS-Adaptive Cropping Systems Lab, Beltsville, MD, 20705

15 <sup>&</sup>DND-CAT, Synchrotron Research Center-Northwestern University at the Advanced Photon  
16 Source, Argonne, IL 60439

17  
18 **\*Corresponding author:** Address: 109 T.W. Alexander Drive, MD-205-05, Research Triangle  
19 Park, NC 27711. E-mail: [bradham.karen@epa.gov](mailto:bradham.karen@epa.gov). Phone: (919) 541-9414. Fax: (919) 541-  
20 3527.

22 **Table of contents**

23 Origin, collection, and processing of soil samples .....Page S2

24 Comparison of soil Pb RBA estimates in mouse and juvenile swine .....Page S3

25 Figure S1: Pb RBA estimates for untreated soil in mouse and juvenile swine models. ..Page S5

26 Figure S2: Pb RBA estimates for PA-treated soil in mouse and juvenile swine models .Page S6

27 Lead Speciation .....Page S7

28 Figure S3: Linear combination fitting results for Pb speciation in diet and feces

29 samples..Page S9

30 Figure S4: Spectra of Pb standards utilized in LCF process .....

31 Page S10

32 Elemental analysis of soils

33 .....Page S10

34 Figure S5: Elemental composition of untreated and treated soils.

35 .....Page S11

36 Anodic stripping voltammetric determination of blood Pb.....Page S11

37 Table S1: QC Data for an anodic stripping voltammetry blood Pb results. ....Page

38 S12

39 References.....Page 13

40

41

42

43

44

45

46  
47  
48  
49  
50  
51  
52  
53  
54  
55  
56  
57  
58  
59  
60  
61  
62  
63  
64  
65  
66  
67  
68

**Origin, collection, and processing of soil samples** - Soil samples used in this work were obtained from field studies that evaluated the effectiveness and persistence of soil amendment treatments to reduce Pb bioavailability. These field studies were conducted under the aegis of the Remediation Technology Development Forum (RTDF), an organization created by the U.S. Environmental Protection Agency (US EPA) in 1992 to foster a public-private sector collaboration to develop and improve technologies for safe and cost-effective solutions to common types of environmental contamination. Under the RTDF mandate, the US EPA National Risk Management Research Laboratory and DuPont Co. formed the In-Place Inactivation and Natural Ecological Restoration Technologies (IINERT) Soil-Metals Action Team in 1995. The IINERT Soil-Metals Action Team included federal, state, and private organizations with a common interest in development and validation of *in situ* techniques to reduce hazards posed by metals in soils. The team's efforts culminated in a field trial of various soil remediation procedures at the Joplin, Missouri, site. The field study included a completely randomized design with four replicates of each treatment, including control plots. A high-density polyethylene membrane was placed around the perimeter of each of the 2 x 4-m plots to reduce the potential of interplot contamination. In order to assure that soils could not move between plots, plots were surrounded with heavy polyethylene sheet (landfill liner grade) pre-installed to 30 cm in the soil and 10 cm above the soil. Amendments were

69 applied on the soil surface by hand to obtain even coverage. Composite samples from each of the  
70 four replications were mixed and sieved. For these studies, phosphoric acid-treated plots were  
71 installed by Dr. John Yang and Mr. David E. Mosby of the University of Missouri. Other plots  
72 were installed by Drs. Sally L. Brown, Carrie E. Green, and William R. Berti. Amendments were  
73 repeatedly rototilled with a tractor operated rototiller mixing the surface to a 0-15 cm depth. At  
74 one month after initial treatment, all plots were treated with calcium hydroxide to raise soil pH,  
75 again rototilled repeatedly for thorough mixing, and seeded with tall fescue grass. Dr. Eton E.  
76 Codling assisted in collecting the soils after 3 years for a feeding trial in juvenile swine. In 2013,  
77 Dr. Green and Ms. Amy Poet assisted RLC in collecting soils for evaluation in the mouse model.

78 Composite samples were prepared for each treatment by pooling together 100 g portions of  
79 soil collected from each of four replicate plots. Pooled soil samples were sieved to 250  $\mu\text{m}$  and  
80 stored at room conditions until analyzed.

81 **Comparison of soil Pb RBA estimates in mouse and juvenile swine** - The Superfund site in  
82 Joplin, Missouri, and the soil remediation plan have been described.<sup>1,2</sup> Estimates of Pb RBA for  
83 the untreated and PA-treated soil obtained in the juvenile swine have been reported.<sup>3</sup> Figure S1  
84 compares the Pb RBA estimates for untreated soil that were obtained in the mouse and the juvenile  
85 swine model. Figure S2 shows estimates of the Pb RBA obtained in mouse using soil collected  
86 about 3 years after application of phosphoric acid and in juvenile swine using soil collected 3 to  
87 78 months after application of phosphoric acid.

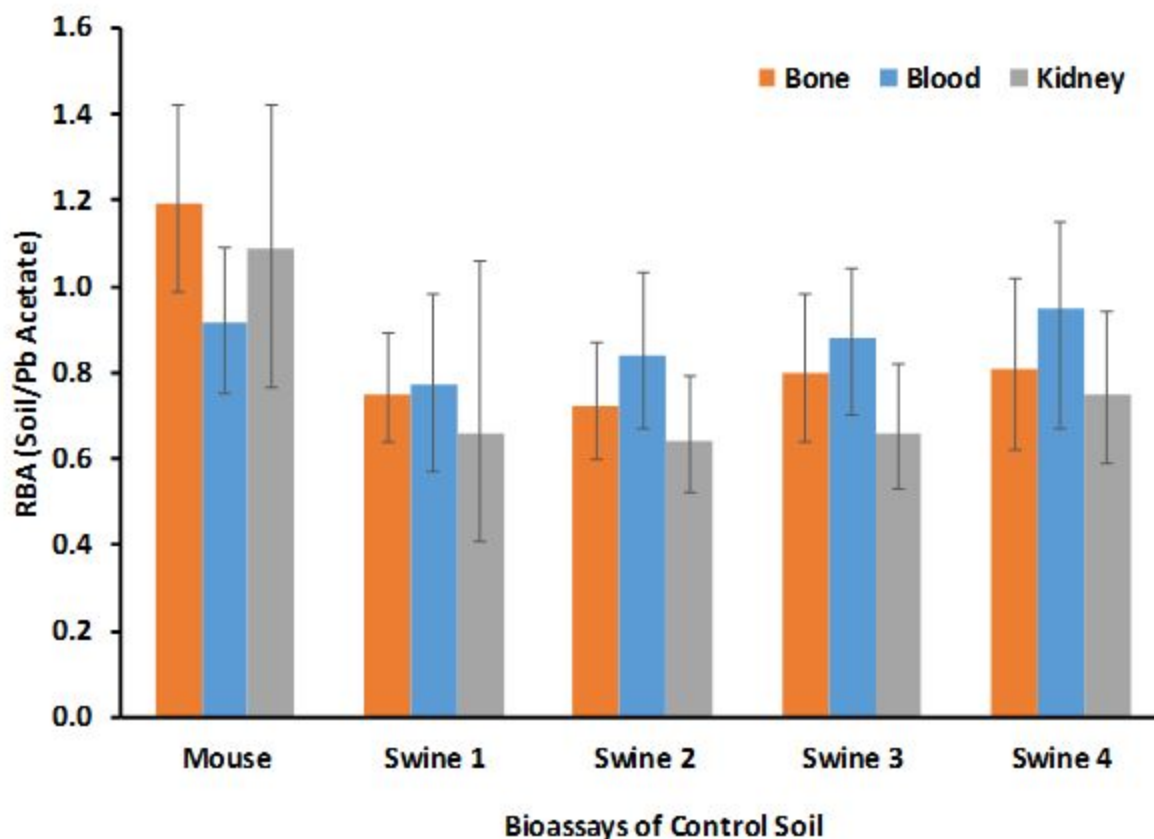

88  
 89 **Figure S1** – Pb RBA estimates for untreated soil in mouse and juvenile swine models. Juvenile  
 90 swine assays of Pb RBA for untreated soil taken from unpublished reports describing results  
 91 of 4 independent trials. Soil tested in Swine 1 and 2 collected less than one year after  
 92 remediation. Soils tested in Swine 3 collected less than two years after remediation. Soil  
 93 tested in Swine 4 collected about seven years after remediation. Mouse assays of Pb RBA for  
 94 untreated soil taken from a single multi-dose level assay. Error bars show 90% confidence  
 95 intervals on mean values. For both species, the bioavailability of the reference compound Pb  
 96 acetate was used in calculation of the RBA for the untreated soil. Each swine assay included  
 97 15 swine dosed with either soil or Pb acetate. Mouse assays included 27 mice dosed with  
 98 soil, 135 mice dosed with Pb acetate (multiple assays).

99

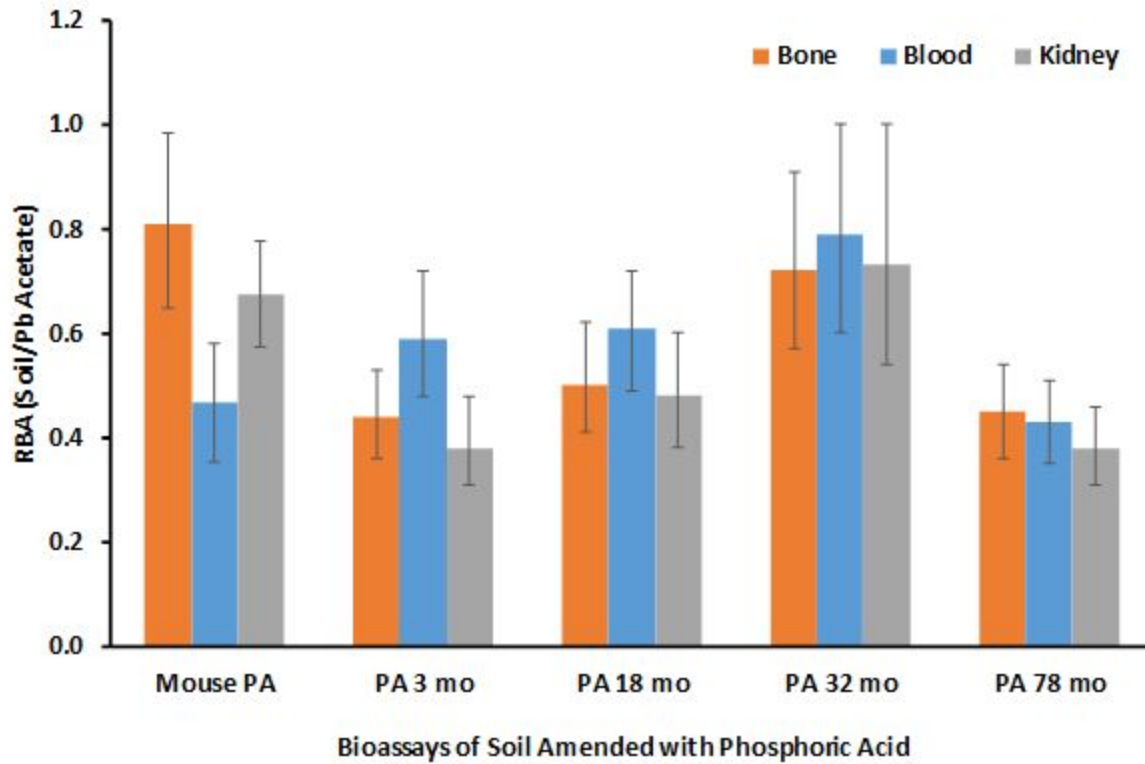

100

101

**Figure S2** – Pb RBA estimates for PA-treated soil in mouse and juvenile swine models, Soils

102

assayed in juvenile swine were collected at 3, 18, 32 or 78 months after treatment. The soil

103

assayed in mice was a composite of soil samples collected about 3 years after treatment.

104

Error bars show 90% confidence intervals on mean values. For both species, the

105

bioavailability of the reference compound Pb acetate was used in calculation of the RBA for

106

the untreated soil. Each swine assay included 15 swine dosed with either soil or Pb acetate.

107

Mouse assays included 27 mice dosed with soil, 135 mice dosed with Pb acetate (multiple

108

assays). R = rototilled.

109

110 **Lead Speciation** - X-ray absorption spectra were collected at the DuPont-Northwestern-Dow  
111 Collaborative Access Team (DND-CAT) Sector 5, beam line 5BM-D, at the Advanced Photon  
112 Source (APS) of the Argonne National Laboratory (ANL), U.S. The storage ring operated at 7  
113 GeV in top-up mode. A water cooled double crystal Si(111) monochromator was used to select  
114 the incident photon energies. The incident X-ray beam intensity was detuned to 60 % of its  
115 maximum. Calibration was performed by assigning the first derivative inflection point of the  
116 absorption  $L_{III}$ -edge of Pb metal (13035 eV), and each sample scan was collected simultaneously  
117 with a Pb metal foil. The samples were ground and pressed into pellets, affixed to a multiport  
118 sample holder, and mounted for analysis without any further modifications. Data collection was  
119 conducted in fluorescence with two Vortex-ME4 four-element silicon drift detectors and  
120 transmission modes for the samples. For most samples, the transmission data were unusable for  
121 analysis. Various Pb standards were used as reference spectra, including mineral sorbed Pb [Pb-  
122 ferrihydrite, Pb-kaolinite, Pb-goethite, Pb-gibbsite, Pb-birnessite, and Pb-montmorillonite in  
123 which each mineral was equilibrated with  $Pb(NO_3)_2$  at pH 6 for a target surface loading of 2500  
124  $mg\ kg^{-1}$  after dialysis], organic bound Pb [Pb-fulvic acid and Pb-humic acid as reagent grade  
125 organic acids equilibrated with  $Pb(NO_3)_2$  at pH 6 for a target loading of 1500  $mg\ kg^{-1}$  after dialysis,  
126 and reagent grade Pb acetate, Pb cysteine, and Pb citrate], Pb carbonate [Smithsonian Natural  
127 History Minerals Collection specimens of cerussite, hydrocerussite, and plumbonacrite with X-ray  
128 diffraction verification], PbO [massicot and litharge], Pb-phosphates (chloropyromorphite,  
129 hydroxypyromorphite, tertiary Pb phosphate ( $Pb_3(PO_4)_2$ ),  $PbHPO_4$ , and Pb sorbed to apatite at pH  
130 6 and surface loading of 2000  $mg\ kg^{-1}$ ], and other Pb minerals [leadhillite, magnetoplumbite,  
131 plumboferrite, plumbogummite, plumbojarosite, anglesite, and galena from the Smithsonian  
132 Natural History Minerals Collection with X-ray diffraction verification]. All reference spectra

133 were collected in transmission mode with dilution calculations determined by XAFSMass mixed  
134 in binder and pressed into a pellet.<sup>4</sup>

135 All sample and standard spectra were calibrated to a Pb foil on the same energy grid, averaged,  
136 and normalized, and the background was removed by spline fitting using IFEFFIT.<sup>5</sup> Principal  
137 components analyses were performed in Sixpack on the k-weighted  $\chi$  functions of the normalized  
138 scans, and target factor analyses of each Pb standard were performed to determine the most  
139 appropriate standards to be used for linear combination fits (LCF) analyses.<sup>6</sup> Pb standards with  
140 SPOIL values <3.0 were used in the LCF analyses, which included mineral sorbed Pb [sum of Pb-  
141 ferrihydrite, Pb-goethite, and Pb-birnessite], organic bound Pb [sum of Pb-fulvic acid and Pb-  
142 humic acid], Pb carbonate [sum of cerussite and hydrocerussite], PbO [sum of massicot and  
143 litharge], Pb-phosphates [chloropyromorphite, hydroxypyromorphite,  $\text{Pb}_3(\text{PO}_4)_2$ , and Pb sorbed to  
144 apatite], and other Pb minerals [plumbojarosite, anglesite, and galena]. The k-weighted  $\chi$  functions  
145 of the standards and samples were used for all linear combination fitting. Levenberg–Marquardt  
146 least squares algorithm was applied to a fit range of 0.6 to 9.0  $\text{\AA}^{-1}$ . Best-fit scenarios, defined as  
147 having the smallest residual error, also had sums of all fractions close to 1. To fully describe any  
148 particular sample within 1% reproducible error, a minimum of two components was necessary,  
149 and results have a  $\pm 10\%$  accuracy.

150 Figure S3 and S4 show linear combination fitting (LCF) results for Pb speciation in diet and  
151 feces samples and for Pb standards, respectively.



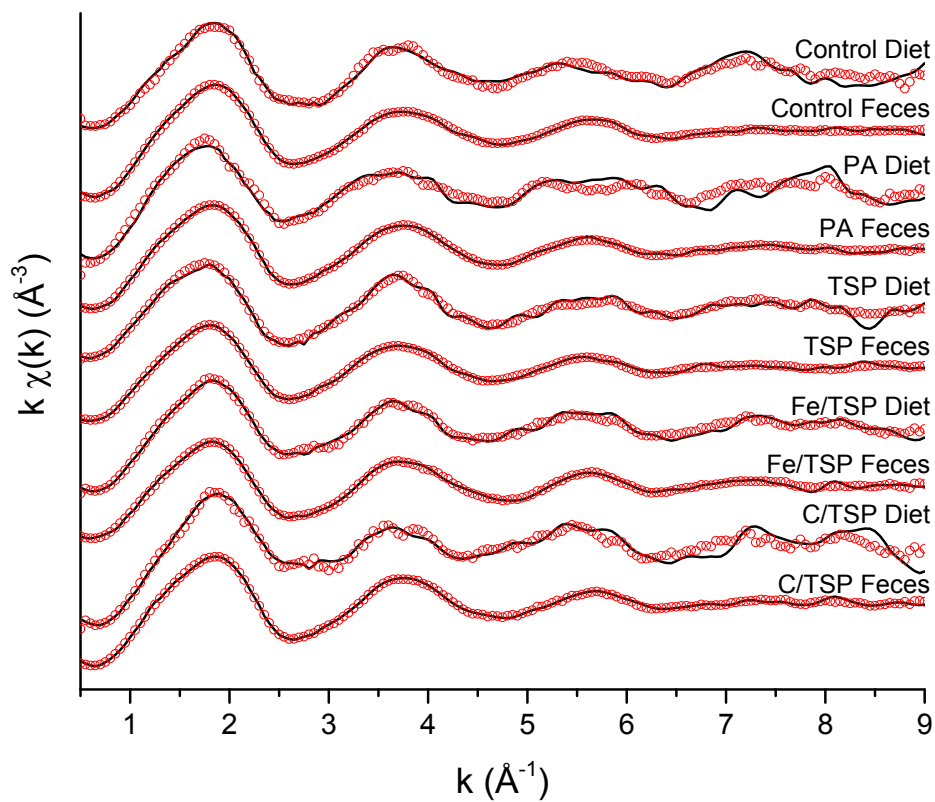

152  
 153 **Figure S3** – Linear combination fitting (LCF) results for Pb speciation in diet and feces  
 154 samples..  
 155

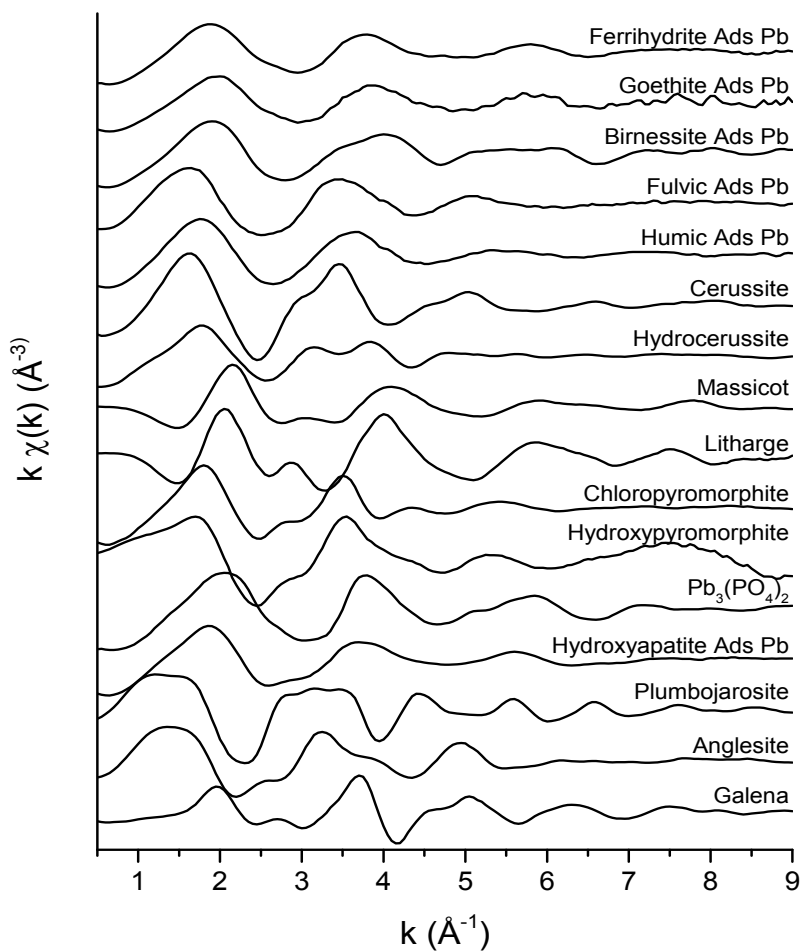

156  
 157 **Figure S4** – Spectra for Pb standards utilized in LCF process

158

159 **Elemental analysis of soils** – Composited soil samples used for the studies reported here were  
 160 prepared by aqua regia digestion and were analyzed by inductively coupled plasma-atomic  
 161 emission spectrometry. Supplemental Figure S5 shows the results of these analyses.

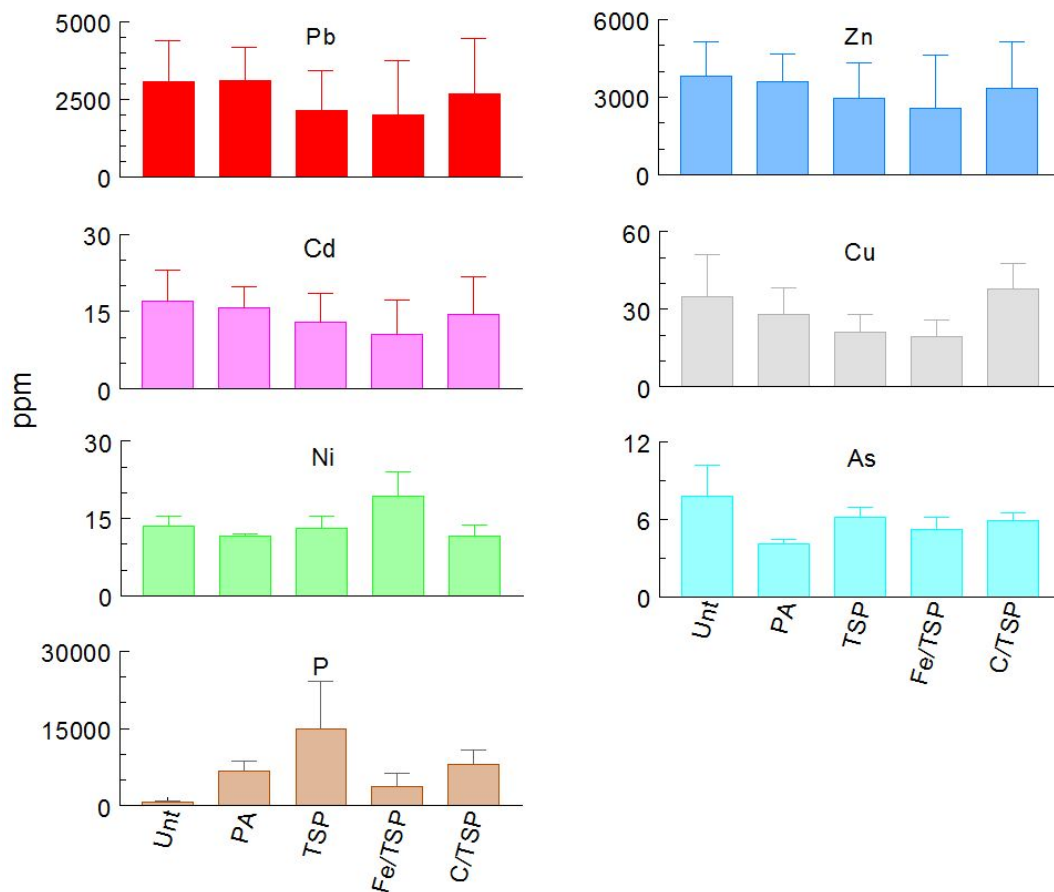

162  
 163 **Figure S5.** Elemental composition of untreated and treated soils. Concentrations of elements  
 164 shown in parts per million (ppm). Samples prepared by aqua regia digestion and analyzed by  
 165 inductively coupled plasma-atomic emission spectrometry. Treatments are phosphoric acid (PA),  
 166 triple super phosphate (TSP) alone or combined with iron oxide (Fe) or biosolids compost (C).  
 167 Error bar show 95% confidence limits for mean values.

168  
 169 **Anodic stripping voltammetric determination of blood Pb** – Pb concentrations were  
 170 determined by anodic stripping voltammetry (ASV) using of NIST SRM 955c (Toxic Metals in  
 171 Caprine Blood) and blood from mice fed control diet that as spiked with Pb at three concentrations.  
 172 Table S1 summarizes the performance of ASV for Pb determination in blood.

173 **Table S1.** Expected and observed Pb levels and recoveries for NIST SRM 955C (Toxic Metals in  
 174 Caprine Blood) and blood collected from mice fed control diet that spiked with Pb at three different  
 175 concentrations, as determined by anodic stripping voltammetry.

| Analyte               | NIST Certified Value ( $\mu\text{g/dL}$ ) | Observed Values ( $\mu\text{g/dL}$ ) (n=3) | % Recovery          |
|-----------------------|-------------------------------------------|--------------------------------------------|---------------------|
| NIST SRM 955C Level 2 | 13.95                                     | 14.9, 13.8, 13.2                           | 106.8, 98.9, 94.6   |
| Pb-spiked mouse blood | Target value ( $\mu\text{g/dL}$ )         | Observed Values ( $\mu\text{g/dL}$ ) (n=3) | % Recovery          |
| Low                   | 2.8                                       | 2.9, 3.0, 2.8                              | 103.6, 107.1, 100.0 |
| Medium                | 13.5                                      | 13.8, 12.9, 12.2                           | 102.2, 95.6, 90.4   |
| High                  | 54.0                                      | 55.2, 54.8, 51.3                           | 102.2, 101.5, 95.0  |

176  
 177  
 178  
 179  
 180  
 181  
 182  
 183  
 184  
 185  
 186  
 187  
 188  
 189  
 190  
 191  
 192  
 193

194 REFERENCES

- 195 (1) Ryan, J.A.; Scheckel, K.G.; Berti, W.R.; Brown, S.L.; Casteel, S.W.; Chaney, R.L.;  
196 Hallfrisch, J.; Doolan, M.; Grevatt, P.; Maddaloni, M.; Mosby, D. Reducing children's risk from  
197 lead in soil. *Environ. Sci. Technol.* 2004, 38 (1), 18A-24A.
- 198 (2) U.S. Environmental Protection Agency. 2004. Mine waste technology program, phosphate  
199 stabilization of heavy metals: Contaminated mine waste yard soils, Joplin, Missouri, NPL site.  
200 Cincinnati, OH: National Risk Management Research Laboratory, U.S. Environmental  
201 Protection Agency. EPA/600/R-04/090  
202 ([https://cfpub.epa.gov/si/si\\_public\\_record\\_Report.cfm?dirEntryId=87290](https://cfpub.epa.gov/si/si_public_record_Report.cfm?dirEntryId=87290)).
- 203 (3) Scheckel, K.G.; Diamond, G.L.; Burgess, M.F.; Klotzbach, J.M.; Maddaloni, M.; Miller,  
204 B.W.; Partridge, C.R.; Serda, S.M. Amending soils with phosphate as means to mitigate soil lead  
205 hazard: a critical review of the state of the science. *J. Toxicol. Environ. Health B Crit. Rev.* 2013,  
206 16 (6), 337-380; DOI 10.1080/10937404.2013.825216.
- 207 (4) Klementiev, K. V. 2012. XAFSmass, freeware:  
208 [www.cells.es/Beamlines/CLAEISS/software/xafsmass.html](http://www.cells.es/Beamlines/CLAEISS/software/xafsmass.html)
- 209 (5) Ravel, B.; Newville, M. ATHENA, ARTEMIS, HEPHAESTUS: data analysis for X-ray  
210 absorption spectroscopy using IFEFFIT. *J. Synchrotron Rad.* 2005, 12, 537-541.
- 211 (6) Webb, S.M. SIXpack: A graphical user interface for XAS analysis using IFEFFIT. *Phys. Scr.*  
212 2005, T115, 1011–1014.
